# Supplementary material for: Correlation of intercalation potential with d-electron configurations for cathode compounds of lithium-ion batteries
Source: Royal Society of Chemistry journal article supplement (doi:10.1039/c4cp00855c), 2014-01-01
Supplement: c4cp00855c1.pdf [file c4cp00855c1.pdf]

## Supporting Information

### Correlation of intercalation potential with d-electron configurations for cathode compounds of lithium-ion batteries

Zhenlian Chen<sup>a</sup>, Caixia Zhang<sup>a,b</sup>, Zhiyong Zhang<sup>c</sup>, and Jun Li<sup>a\*</sup>,

<sup>a</sup> Ningbo Institute of Material Technology and Engineering, Chinese Academy of Sciences, Ningbo 315201, PR China. Fax: 086-0574-86685043; Tel: 086-0574-86688074;  
<sup>b</sup> College of Physics and Information Engineering, Fuzhou University, Fuzhou 350116, PR China;  
<sup>c</sup> Stanford Research Computing Facility, Stanford University, 255 Panama Street, Stanford, California 94305, USA.

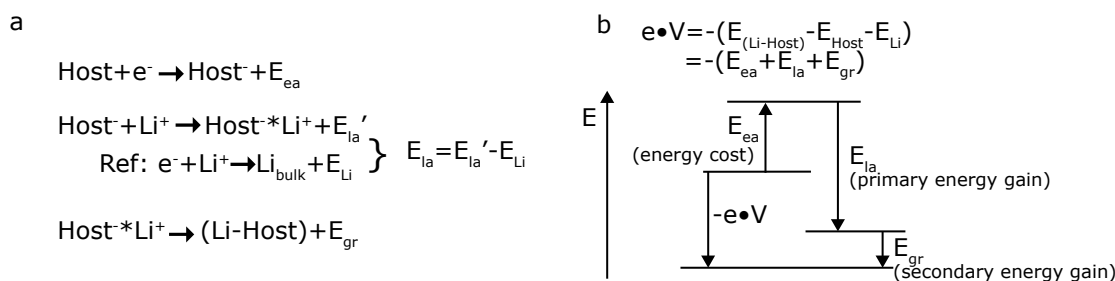

Fig.S1. The three energy terms involved with intercalation potential. (a) Equations describing the three decomposed intercalation processes, which define the three energy terms. Host\*Li and (Li-Host) represent the intercalated state before and after structure relaxation, respectively. (b) Schematic illustration of the relation between the intercalation potential and the three energy terms.

**Table S1** The M-O and Li-O bond lengths for layered LiMO<sub>2</sub>. The units are Å. The “deli” and “li” represent delithiated and lithiated phases, respectively. In the delithiated phase, Li-O bond is measured with Li ions distributed with the fractional coordinates in the lithiated phase. The Δd (Li-O) represents the change of Li-O bond length by the Li<sup>+</sup> insertion.

|                    | M-O bond |            | Li-O bond |            | Δd (Li-O) |
|--------------------|----------|------------|-----------|------------|-----------|
|                    | deli-    | Li-        | deli-     | li-        |           |
| LiMnO <sub>2</sub> | 1.93     | 1.95, 2.28 | 2.04      | 2.11, 2.17 | 0.10      |
| LiFeO <sub>2</sub> | 1.96     | 2.03       | 2.01      | 2.12       | 0.11      |
| LiCoO <sub>2</sub> | 1.88     | 1.93       | 2.00      | 2.07       | 0.07      |
| LiNiO <sub>2</sub> | 1.86     | 1.96       | 1.97      | 2.08       | 0.11      |

Mn<sup>3+</sup> cation in LiMnO<sub>2</sub> is so instable within the initial *R3m* (without Jahn-Teller distortion) group that the ligand anions are relaxed to form Jahn-Teller distorted octahedron surround the Mn<sup>3+</sup> cation forming two kinds of Mn-O bonds with different lengths.

**Table S2** The values of energy difference between HS and LS states ( $E_{\text{HS}}-E_{\text{LS}}$ ) obtained with first-principles calculations, the parameterized expressions of the term  $E_{\text{HS}}-E_{\text{LS}}$  within CF theory and CF splitting  $\Delta$  estimated from the  $E_{\text{HS}}-E_{\text{LS}}$  term, in the delithiated phases. The units are eV. The label \* means the value is hypothetical, not deduced from  $E_{\text{HS}}-E_{\text{LS}}$  term. E.C (HS: LS) represent the d-electron configuration of the cations in HS and LS states.

| TME | $\text{MO}_2$                   |                               |                                     |          | $\text{MPO}_4$                  |                               |                                     |          | $\text{LiMSiO}_4$     |                               |                                     |          |
|-----|---------------------------------|-------------------------------|-------------------------------------|----------|---------------------------------|-------------------------------|-------------------------------------|----------|-----------------------|-------------------------------|-------------------------------------|----------|
|     | E.C (HS: LS)                    | $E_{\text{HS}}-E_{\text{LS}}$ |                                     | $\Delta$ | E.C (HS: LS)                    | $E_{\text{HS}}-E_{\text{LS}}$ |                                     | $\Delta$ | E.C (HS: LS)          | $E_{\text{HS}}-E_{\text{LS}}$ |                                     | $\Delta$ |
|     |                                 | value                         | expression                          |          |                                 | value                         | expression                          |          |                       | value                         | expression                          |          |
| Mn  | $t_{2g}^3 e_g^0$                |                               |                                     | 2.50*    | $t_{2g}^3 e_g^1 t_{2g}^4 e_g^0$ | -1.17                         | $\Delta_{\text{O}}-5J_{\text{H}}$   | 1.33     | $e^2 t_2^2 e^4 t_2^0$ | -2.97                         | $2\Delta_{\text{T}}-8J_{\text{H}}$  | 0.52     |
| Fe  | $t_{2g}^3 e_g^1 t_{2g}^4 e_g^0$ | -0.76                         | $\Delta_{\text{O}}-5J_{\text{H}}$   | 1.74     | $t_{2g}^3 e_g^2 t_{2g}^5 e_g^0$ | -1.53                         | $2\Delta_{\text{O}}-10J_{\text{H}}$ | 1.74     | $e^2 t_2^3 e^4 t_2^1$ | -1.76                         | $2\Delta_{\text{T}}-10J_{\text{H}}$ | 1.62     |
| Co  | $t_{2g}^3 e_g^2 t_{2g}^5 e_g^0$ | 0.83                          | $2\Delta_{\text{O}}-10J_{\text{H}}$ | 2.92     | $t_{2g}^4 e_g^2 t_{2g}^6 e_g^0$ | -0.61                         | $2\Delta_{\text{O}}-8J_{\text{H}}$  | 1.70     | $e^3 t_2^3 e^4 t_2^2$ | -0.69                         | $\Delta_{\text{T}}-5J_{\text{H}}$   | 1.81     |
| Ni  | $t_{2g}^4 e_g^2 t_{2g}^6 e_g^0$ | 1.03                          | $2\Delta_{\text{O}}-8J_{\text{H}}$  | 2.52     | $t_{2g}^5 e_g^2 t_{2g}^6 e_g^1$ | 0.24                          | $\Delta_{\text{O}}-4J_{\text{H}}$   | 1.81     | $e^4 t_2^3$           |                               |                                     | 0.80*    |
